# Supplementary material for: FOXM1/LINC00152 feedback loop regulates proliferation and apoptosis in rheumatoid arthritis fibroblast-like synoviocytes via Wnt/β-catenin signaling pathway
Source: PubMed Central journal article supplement (PMC6974425; doi:10.1042/bsr20191900), 2020-01-21
Supplement: BSR-2019-1900_supp.pdf [file BSR-2019-1900_supp.pdf]

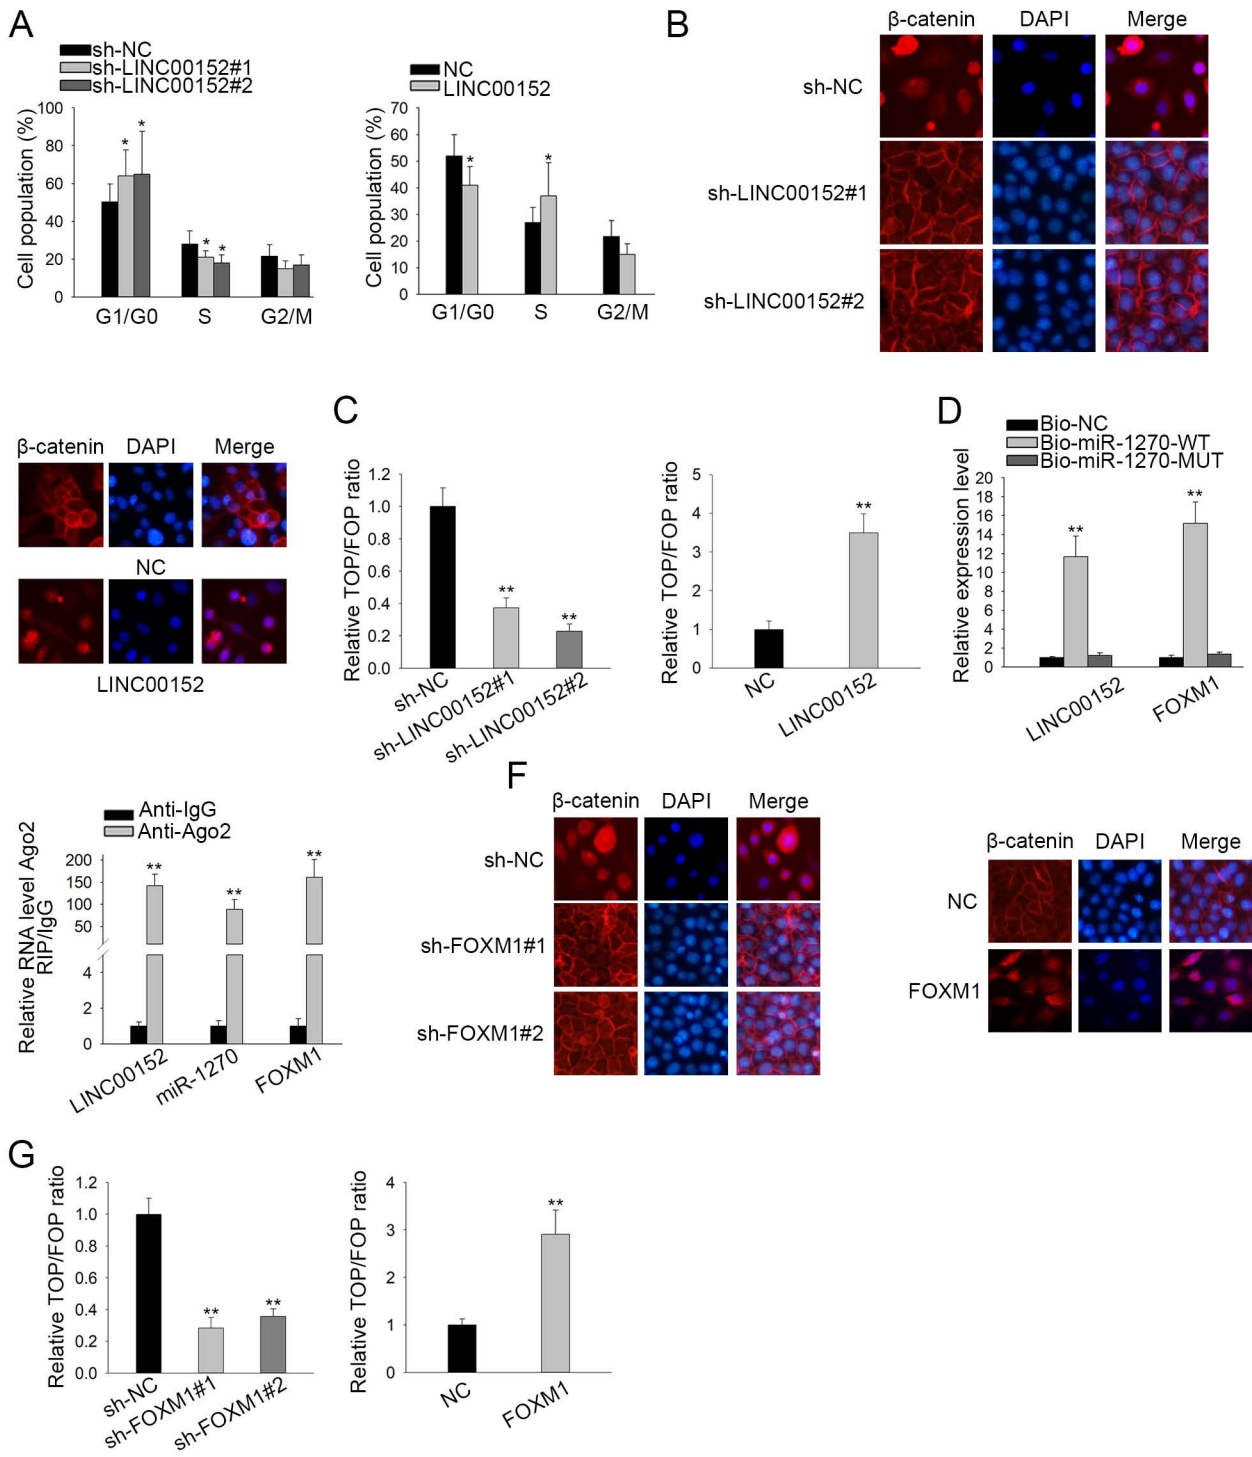

**Figure S1** (A) RA FLS cell cycle was analyzed via flow cytometry following LINC00152 augmentation or inhibition. (B) Immunofluorescence assay illuminated the impacts of LINC00152 on  $\beta$ -catenin nuclear translocation. (C) The usage of TOP/FOP flash luciferase reporter assay for the impact of LINC00152 on Wnt/ $\beta$ -catenin signaling pathway activity. (D) RNA pull-down analysis of interaction among LINC00152, miR-1270 and FOXM1. (E) RIP assay probed the interplay among LINC00152, miR-1270 and FOXM1. (F) Immunofluorescence assay investigated the effects of FOXM1 on  $\beta$ -catenin nuclear accumulation. (G) The appliance of TOP/FOP flash luciferase reporter assay to determine the influence of FOXM1 on Wnt/ $\beta$ -catenin signaling pathway activity. \*P < 0.05, \*\*P < 0.01.
